# Supplementary material
Source: PubMed Central journal article supplement (PMC6646246)
Supplement: ao8b02051_si_001.pdf [file ao8b02051_si_001.pdf]

## Supporting Information

# Ionic liquid-assisted synthesis of mesoporous silk fibroin/silica hybrids for biomedical applications

Rui F. P. Pereira,<sup>a,b,\*</sup> Kerstin Zehbe,<sup>c</sup> Christina Günter,<sup>c</sup> Tiago dos Santos,<sup>d,e</sup> Sílvia C. Nunes,<sup>f</sup>

Filipe A. Almeida Paz,<sup>g</sup> Maria M. Silva,<sup>a</sup> Pedro L. Granja,<sup>d,e,f,g</sup> Andreas Taubert<sup>c,\*</sup> and Verónica de Zea Bermudez<sup>b,j,\*</sup>

<sup>a</sup>Chemistry Center, University of Minho, 4710-057 Braga, Portugal

<sup>b</sup>CQ-VR, University of Trás-os-Montes e Alto Douro, 5000-801 Vila Real, Portugal

<sup>c</sup>Institute of Chemistry, University of Potsdam, Karl-Liebknecht-Straße 24-25, D-14476 Potsdam, Germany

<sup>d</sup>i3S - Instituto de Investigação e Inovação em Saúde and <sup>e</sup>INEB – Instituto de Engenharia Biomédica, 4200-135 Universidade do Porto, Portugal

<sup>f</sup>Chemistry Department and CICS – Health Sciences Research Centre, University of Beira Interior, 6201-001 Covilhã, Portugal

<sup>g</sup>Chemistry Department, University of Aveiro, CICECO-Aveiro Institute of Materials, 3810-193 Aveiro, Portugal

<sup>h</sup>Instituto de Ciências Biomédicas Abel Salazar, Universidade do Porto, 4050-313 Porto, Portugal

<sup>i</sup>Faculdade de Engenharia da Universidade do Porto, 4200-465 Porto, Portugal

<sup>j</sup>Chemistry Department, University of Trás-os-Montes e Alto Douro, 5000-801 Vila Real, Portugal

**Table S1.** Relevant data of the synthesis of the SF/silica hybrids

| Sample | m <sub>SF:[Bmim][Cl] mix</sub><br>(g) | m <sub>TMOS</sub><br>(mg) | [HCl]<br>(M) | V <sub>HCl</sub><br>(μL) | [NaOH]<br>(M) | V <sub>NaOH</sub><br>(μL) | Aging time<br>(days) |
|--------|---------------------------------------|---------------------------|--------------|--------------------------|---------------|---------------------------|----------------------|
| H1     | 2.0295                                | 507.38                    | 1.0          | 240                      | -             | -                         |                      |
| H2     | 1.6524                                | 413.10                    | 1.0          | 196                      | 0.01          | 196                       | 2                    |
| H3     | 1.5978                                | 399.45                    | 0.01         | 189                      | -             | -                         |                      |
| H4     | 1.7134                                | 428.35                    | 0.01         | 203                      | 0.01          | 203                       |                      |
| H3'    | 1.7542                                | 438.55                    | 0.01         | 208                      | -             | -                         | 7                    |
| H4'    | 1.7648                                | 466.20                    | 0.01         | 221                      | 0.01          | 221                       |                      |

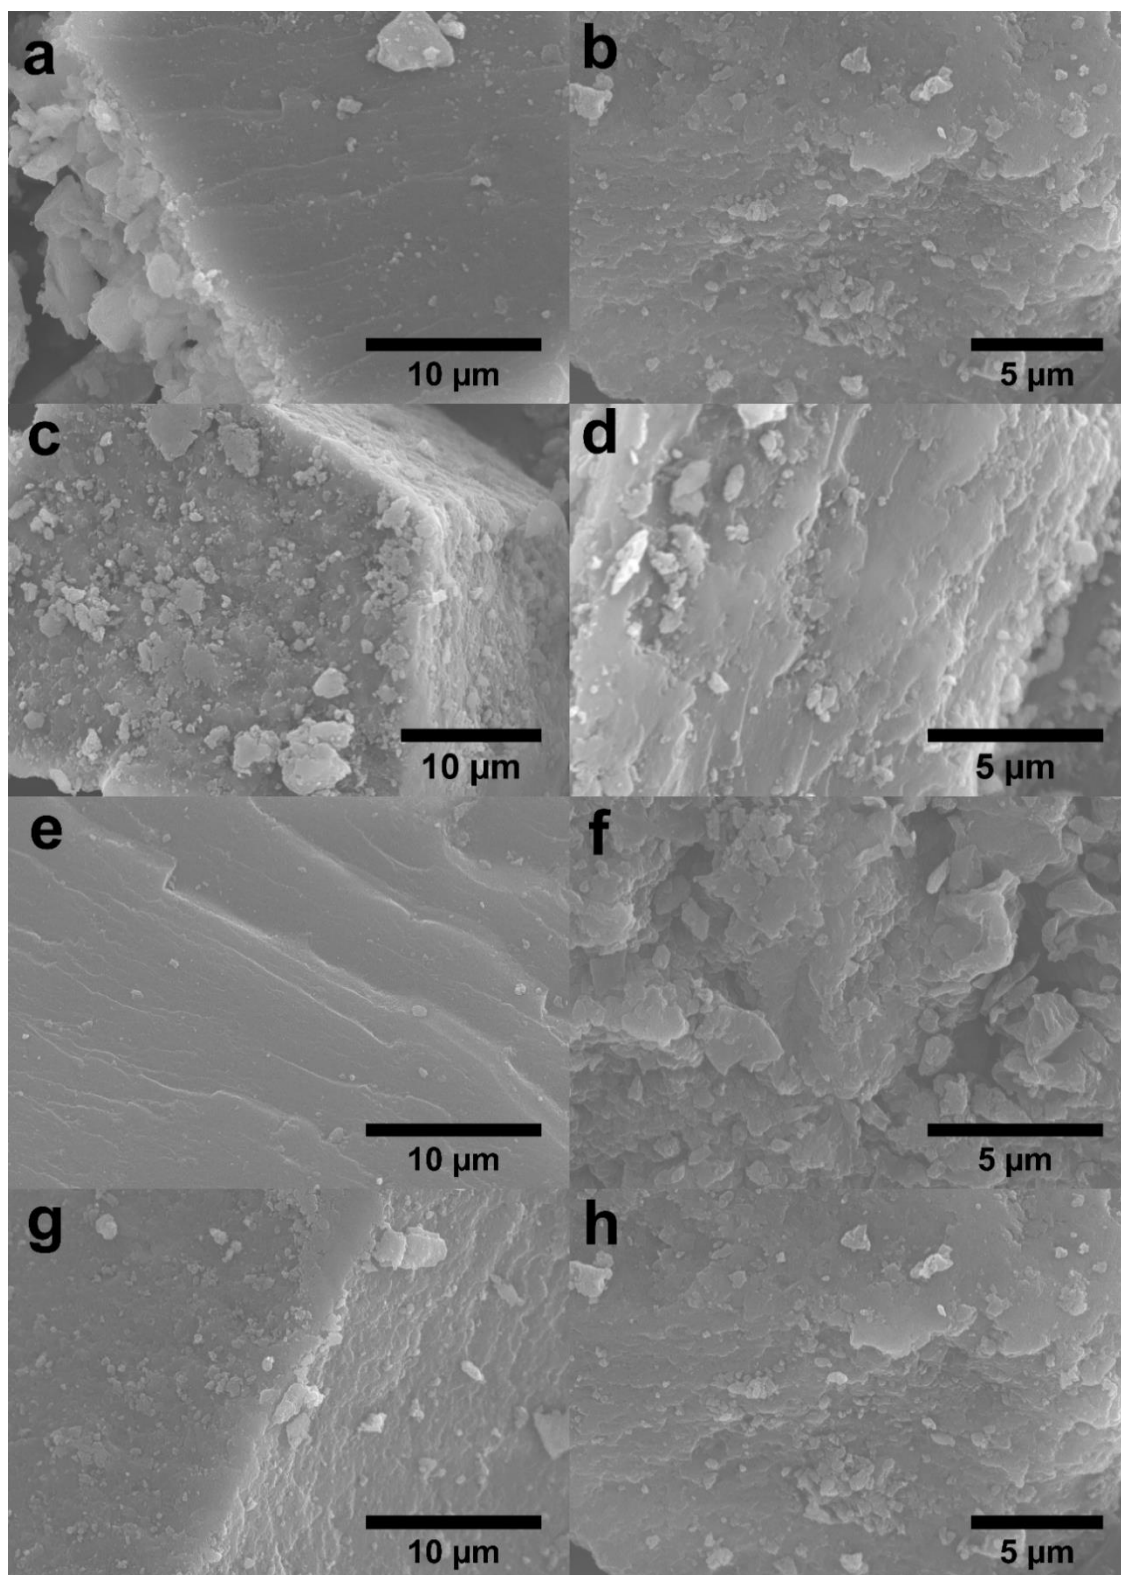

**Figure S1.** SEM images of the H2 (a, b), H3 (c, d), H3' (e, f), and H4 (g, h) hybrids

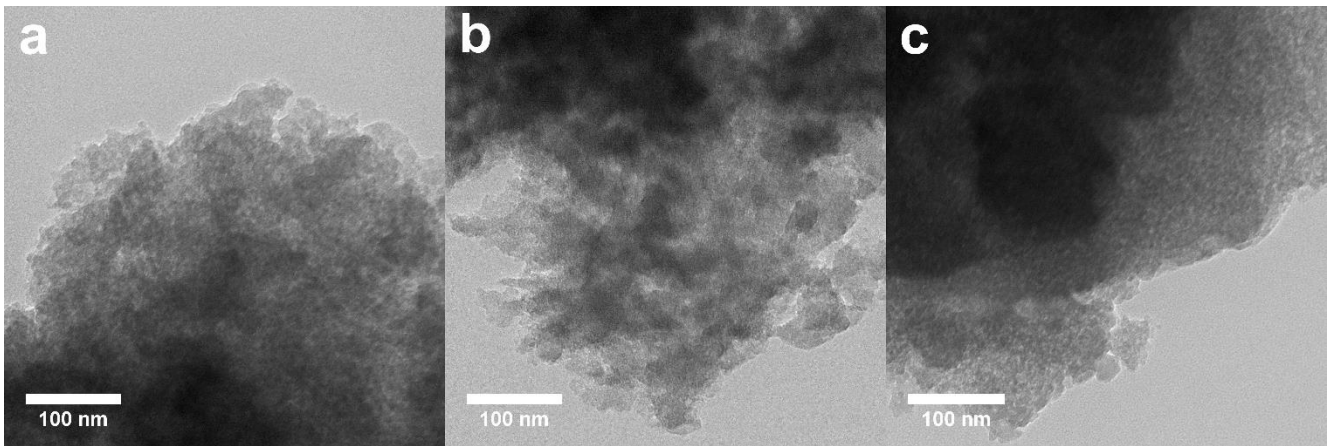

**Figure S2.** TEM image of the H3 (a), H3' (b) and H4 (c) SF/silica hybrids.

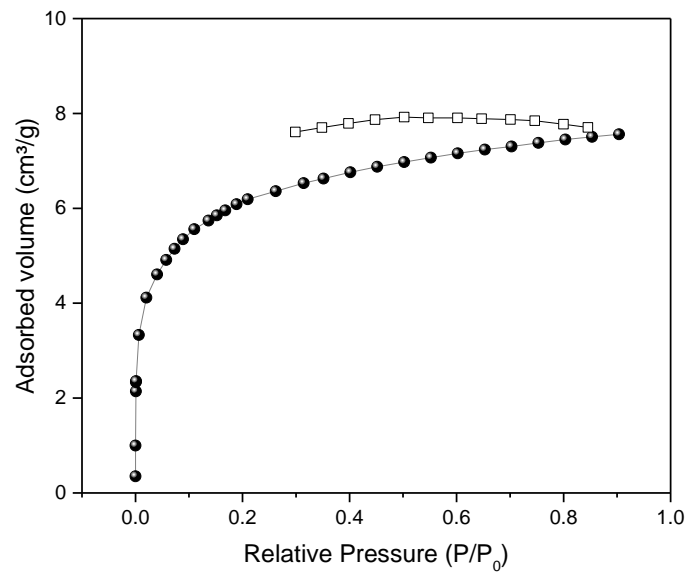

**Figure S3.** Nitrogen adsorption (open squares)-desorption (closed spheres) isotherms of the H2 SF/silica hybrid.

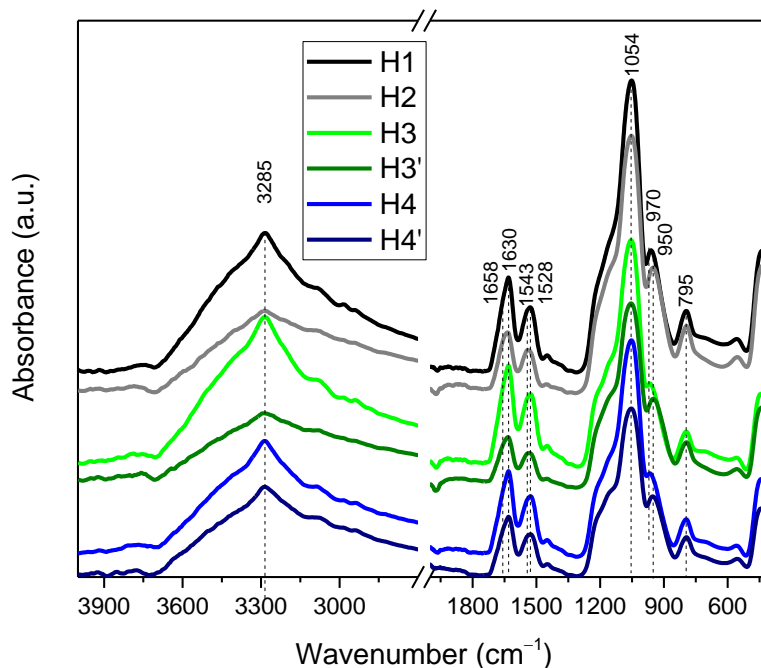

**Figure S4.** ATR/FT-IR spectra of the prepared silk-based hybrids.

**Table S2.**  $^{13}\text{C}$  CP/MAS NMR chemical shifts (in ppm) of the amino acid residues Ala, Gly and Ser of the SF/silica hybrids. Peak assignment<sup>1-4</sup> is indicated in parenthesis, where I is silk I and  $\beta$  is  $\beta$ -sheet.

| Sample     | Ala               |                            |                     | Gly               |                     | Ser                        |
|------------|-------------------|----------------------------|---------------------|-------------------|---------------------|----------------------------|
|            | $\text{C}_\alpha$ | $\text{C}_\beta$           | $\text{C}=\text{O}$ | $\text{C}_\alpha$ | $\text{C}=\text{O}$ | $\text{C}_\alpha$          |
| <b>H1</b>  | 49.1 ( $\beta$ )  | 19.8 ( $\beta$ ); 16.7 (I) | 172.4 ( $\beta$ )   | 42.8 ( $\beta$ )  | 169.6 ( $\beta$ )   | 58.0 (I); 54.5 ( $\beta$ ) |
| <b>H2</b>  | 49.2 ( $\beta$ )  | 20.0 ( $\beta$ ); 16.8 (I) | 172.4 ( $\beta$ )   | 42.8 ( $\beta$ )  | 169.6 ( $\beta$ )   | - ; 54.5 ( $\beta$ )       |
| <b>H3</b>  | 49.4 ( $\beta$ )  | 20.4 ( $\beta$ ); 17.2 (I) | 172.4 ( $\beta$ )   | 42.8 ( $\beta$ )  | 169.6 ( $\beta$ )   | - ; 54.5 ( $\beta$ )       |
| <b>H3'</b> | 49.2 ( $\beta$ )  | 20.0 ( $\beta$ ); 16.8 (I) | 172.4 ( $\beta$ )   | 42.8 ( $\beta$ )  | 169.6 ( $\beta$ )   | - ; 54.8 ( $\beta$ )       |
| <b>H4</b>  | 49.1 ( $\beta$ )  | 20.1 ( $\beta$ ); 16.2 (I) | 172.4 ( $\beta$ )   | 42.7 ( $\beta$ )  | 169.8 ( $\beta$ )   | 57.6 (I); 54.2 ( $\beta$ ) |
| <b>H4'</b> | 49.2 ( $\beta$ )  | 20.0 ( $\beta$ ); 16.8 (I) | 172.5 ( $\beta$ )   | 42.8 ( $\beta$ )  | 170.1 ( $\beta$ )   | - ; 55.1 ( $\beta$ )       |

## References

- Asakura, T.; Demura, M.; Date, T.; Miyashita, N.; Ogawa, K.; Williamson, M. P., NMR study of silk I structure of *Bombyx mori* silk fibroin with  $^{15}\text{N}$ - and  $^{13}\text{C}$ -NMR chemical shift contour plots. *Biopolymers* **1997**, *41*, 193-203.
- Hronska, M.; van Beek, J. D.; Williamson, P. T. F.; Vollrath, F.; Meier, B. H., NMR characterization of native liquid spider dragline silk from *Nephila edulis*. *Biomacromolecules* **2004**, *5*, 834-839.
- Asakura, T.; Suzuki, Y.; Nakazawa, Y.; Yazawa, K.; Holland, G. P.; Yarger, J. L., Silk structure studied with nuclear magnetic resonance. *Prog. Nucl. Magn. Reson. Spectrosc.* **2013**, *69*, 23-68.
- Asakura, T.; Okushita, K.; Williamson, M. P., Analysis of the structure of *Bombyx mori* silk fibroin by NMR. *Macromolecules* **2015**, *48*, 2345-2357.
